# Supplementary material
Source: ML conference proceedings conference paper supplement (https://proceedings.mlr.press/v139/goyal21a.html)
Supplement: Supplementary file [file goyal21a-supp.pdf]

A. Appendix

440  
441  
442  
443  
444  
445  
446  
447  
448  
449  
450  
451  
452  
453  
454  
455  
456  
457  
458  
459  
460  
461  
462  
463  
464  
465  
466  
467  
468  
469  
470  
471  
472  
473  
474  
475  
476  
477  
478  
479  
480  
481  
482  
483  
484  
485  
486  
487  
488  
489  
490  
491  
492  
493  
494

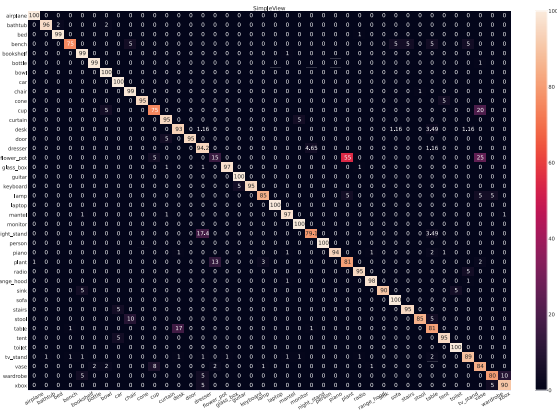

Figure I. Confusion matrix for SimpleView when trained under our protocol

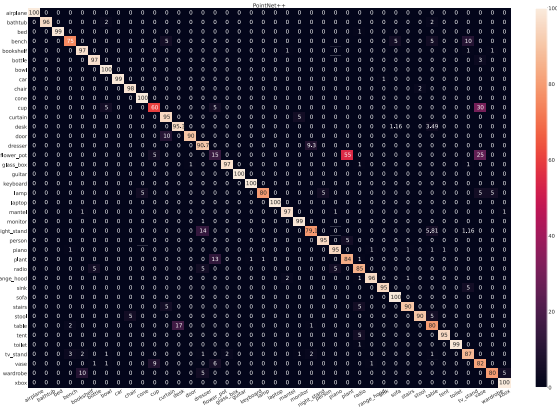

Figure II. Confusion matrix for PointNet++ when trained under our protocol
